# Supplementary material for: Comparative Transcriptome Analysis in Eggplant Reveals Selection Trends during Eggplant Domestication
Source: Int J Genomics. 2019 May 9;2019:7924383. doi: 10.1155/2019/7924383 (PMC6532321; doi:10.1155/2019/7924383)
Supplement: Supplementary Materials — Table S1: detailed GO annotation of species-specific genes for the three wild eggplant species and two cultivars. Table S2: specific GO terms for the three wild eggplant species and two cultivars. Table S3: overrepresented KEGG pathway enrichment among genes with higher expression based on the interspecific pairwise gene expression comparisons. Table S4: primer sequences for the 16 random selected genes used in qPCR analysis. [file 7924383.f1.xlsx]

## Sheet: Table S1
Table S1 Detailed GO annotation of species-specific genes for the three wild eggplant species and two cultivars
GO Level 1	Go Level 2	Go level 4 item number, Gene number
		MEL_ HZHQ	AET_SG	MEL_NASH	INT_2006	SIS_2007
		S. melongena	S. aethiopicum	S. melongena	S. integrifolium	S. sisymbriifolium
Biological Process	Locomotion	817	24	830
	Positive regulation of biological process	761	921	17128	810
	Cell killing				11	212
Cellular Component	Cell Juction	24	11
	Extracellular matrix part	828		9611
	synapse	15
Molecular Function	Receptor activity	125	25	327
	Channel regulator activity		12	114	11	12

## Sheet: Table S2
Table S2 Specific GO terms for the three wild eggplant species and two cultivars
GO level 2	INT_2006	SIS_2007	MEL_ HZHQ	AET_SG	MEL_NASH
	S. integrifolium	S. sisymbriifolium	S. melongena	S. aethiopicum	S. melongena
Cell killing	cytolysis in other organism	killing of cells in other organism involved in symbiotic interaction
		cytolysis in other organism
Cell junction			cell-substrate adherens junction	gap junction
Extracellular matrix part			laminin complex		basement membrane
			basal lamina		fibril
			laminin complex		basal lamina
			other organism		other organism
			basal lamina		laminin complex
			host cell part		other organism cell
			other organism cell		host cell part
			basement membrane		other organism membrane
					plasma lipoprotein particle
					laminin complex
					basal lamina
Synapse			synaptic membrane
Receptor activity			transmembrane signaling receptor activity	peptide receptor activity	peptide receptor activity
				transmembrane signaling receptor activity	steroid hormone receptor activity
					transmembrane signaling receptor activity
Channel regulator activity	ion channel inhibitor activity	ion channel inhibitor activity		ion channel inhibitor activity	ion channel inhibitor activity

## Sheet: Table S3
Table S3 Over-represented KEGG pathway enrichment among genes with higher expression based on the interspecific pairwise gene-expression comparisons
Sample Name	Description	Corrected P-value
MEL_HZHQ-AET_SG	Fatty acid degradation	0.0511
	Photosynthesis - antenna proteins	0.0511
	Plant-pathogen interaction	0.0511
	Glutathione metabolism	0.0511
AET_SG-MEL_HZHQ	Starch and sucrose metabolism	0.0211
	Steroid biosynthesis	0.0211
MEL_HZHQ-AET_2006	Fatty acid degradation	0.000159
	Glutathione metabolism	0.0331
AET_2006-MEL_HZHQ	Porphyrin and chlorophyll metabolism	8e-06
	Steroid biosynthesis	0.000753
	Biosynthesis of secondary metabolites	0.000753
MEL_HZHQ-SIS_2007	Plant-pathogen interaction	9.27e-06
	Fatty acid degradation	0.00141
	Plant hormone signal transduction	0.00823
	Glutathione metabolism	0.03
SIS_2007-MEL_HZHQ	Ribosome	0
	Porphyrin and chlorophyll metabolism	1.66e-05
	Carbon fixation in photosynthetic organisms	3.82e-05
	Photosynthesis	0.0121
	Glyoxylate and dicarboxylate metabolism	0.041
	Biosynthesis of amino acids	0.041
	Photosynthesis - antenna proteins	0.041
MEL_LYQ-AET_SG	Photosynthesis - antenna proteins	0.000137
	Protein processing in endoplasmic reticulum	0.05
	Glutathione metabolism	0.05
AET_SG-MEL_LYQ	Carotenoid biosynthesis	0.00163
	Carbon fixation in photosynthetic organisms	0.00163
MEL_LYQ-INTT_2006	alpha-Linolenic acid metabolism	0.0313
INTT_2006-MEL_LYQ	Carotenoid biosynthesis	0.0186
	Photosynthesis	0.0186
	Carbon fixation in photosynthetic organisms	0.0186
SIS_2007-MEL_LYQ	Ribosome	0
	Carbon fixation in photosynthetic organisms	8.82e-08
	Photosynthesis	0.000123
	Carbon metabolism	0.000123
	Porphyrin and chlorophyll metabolism	0.00193
	Biosynthesis of amino acids	0.00679
	Glyoxylate and dicarboxylate metabolism	0.019
	Photosynthesis - antenna proteins	0.0273
	Oxidative phosphorylation	0.0281
	Glycine, serine and threonine metabolism	0.0412
MEL_S58-INT_2006	Fatty acid degradation	0.0014
	alpha-Linolenic acid metabolism	0.023
	Glutathione metabolism	0.029
	Biosynthesis of unsaturated fatty acids	0.041
	Fatty acid metabolism	0.057
INT_2006-MEL_S58	Photosynthesis - antenna proteins	0.00061
	Steroid biosynthesis	0.00061
	Porphyrin and chlorophyll metabolism	0.00195
MEL_S58-SIS_2007	alpha-Linolenic acid metabolism	0.021
	Fatty acid degradation	0.021
	Plant hormone signal transduction	0.021
	Valine, leucine and isoleucine degradation	0.021
	Plant-pathogen interaction	0.021
	Biosynthesis of unsaturated fatty acids	0.036
SIS_2007-MEL_S58	Ribosome	0
	Porphyrin and chlorophyll metabolism	0.000997
	Photosynthesis - antenna proteins	0.00286
	Biosynthesis of amino acids	0.0245
	Photosynthesis	0.0294
SIS_2007-INT_2006	Ribosome	0
	Carbon fixation in photosynthetic organisms	9.1e-05
	Carbon metabolism	0.0044
	Glyoxylate and dicarboxylate metabolism	0.0074
	Photosynthesis - antenna proteins	0.0084
	Photosynthesis	0.011
	Oxidative phosphorylation	0.016
INT_2006-SIS_2007	Steroid biosynthesis	0.0161
	Plant-pathogen interaction	0.0161
AET_SG-SIS_2007	Plant hormone signal transduction	0.00131
SIS_2007-AET_SG	Ribosome	0
	Carbon fixation in photosynthetic organisms	3.2e-06
	Carbon metabolism	3.5e-05
	Biosynthesis of amino acids	3.5e-05
	Photosynthesis	0.00041
	Photosynthesis - antenna proteins	0.0037
	Porphyrin and chlorophyll metabolism	0.013
	Fructose and mannose metabolism	0.04
	Glyoxylate and dicarboxylate metabolism	0.041
	Glycolysis / Gluconeogenesis	0.053
	Oxidative phosphorylation	0.053

## Sheet: Table S4
Table S4 Primer sequences for the 16 random selected genes used in Q-PCR analysis
Primer名称	引物序列(5'to3')
comp100012_c0-F	TATGGGAACTTCTGAACC
comp100012_c0-R	GATGCTAACCCTGACCTG
comp100114_c0-F	TTTCTGAGCAGGATTTG
comp100114_c0-R	ATTGCATAGGAGTAGGG
comp10132_c0-F	GTAAGAATGAGCGGAAGC
comp10132_c0-R	CTGTTTGGGTTGAATAGC
comp10137_c0-F	CGTGCTTTCCGTGTTTG
comp10137_c0-R	TGTTAGCTGGAGGTGCTG
comp10145_c0-F	AATATGGATGGGCTTGTC
comp10145_c0-R	AATGGGAATTAGCACTCG
comp101559_c0-F	ACGCTGCAATGATATGTG
comp101559_c0-R	GGTTAATCAGTCTTAATTTTCC
comp10296_c0-F	CTCTTCCTCACTCTGTCCTCCTG
comp10296_c0-R	CTGAAACTGTTCTTGCTGCTGT
comp10311-F	TTCCGAGAATGCCGACACCACC
comp10311-R	CCTCCAGCACCCTTAATTGACC
comp103953-F	CATTCTACAACCTTTCTTCCTC
comp103953-R	CTCTTTTGTTCCATTCTTTCTC
comp104557-F	ATCTCACATAACCTGAAAGTC
comp104557-R	AACAACAGTATCAATAGCCTAC
comp10488-F	CAACTAGCAAGTATAGAATATG
comp10488-R	GTTTTGGTCAAAGCTAATAAAG
comp10517-F	ATGATGTTGGTGTCCGATAGAG
comp10517-R	ATTTAGAGGTGGGATGGAACTG
comp10525-F	CCTGGATCATGTTTGGGTGGTG
comp10525-R	GTCCTAAGAAGGTTACAGTGCC
comp10540-F	AGATAGCGTTGAATAAGAAAGG
comp10540-R	CAGTGAAGCCAATAATGACC
comp10599-F	GGTTTGTGGTGGGAGGTTGC
comp10599-R	CGTACTCTGCGTAAATGGG
comp10621-F	AGAGTCGGATAGTCCTTCGTC
comp10621-R	ACAATGTTGTGCTGCCCTTAC
